# Supplementary figures and images for: Production of mixed element actinide reference particulates to support nuclear safeguards using THESEUS, an aerosol-based particulate synthetic methodology
Source: Royal Society of Chemistry journal article supplement (doi:10.1039/d2an01774a), 2023-01-01

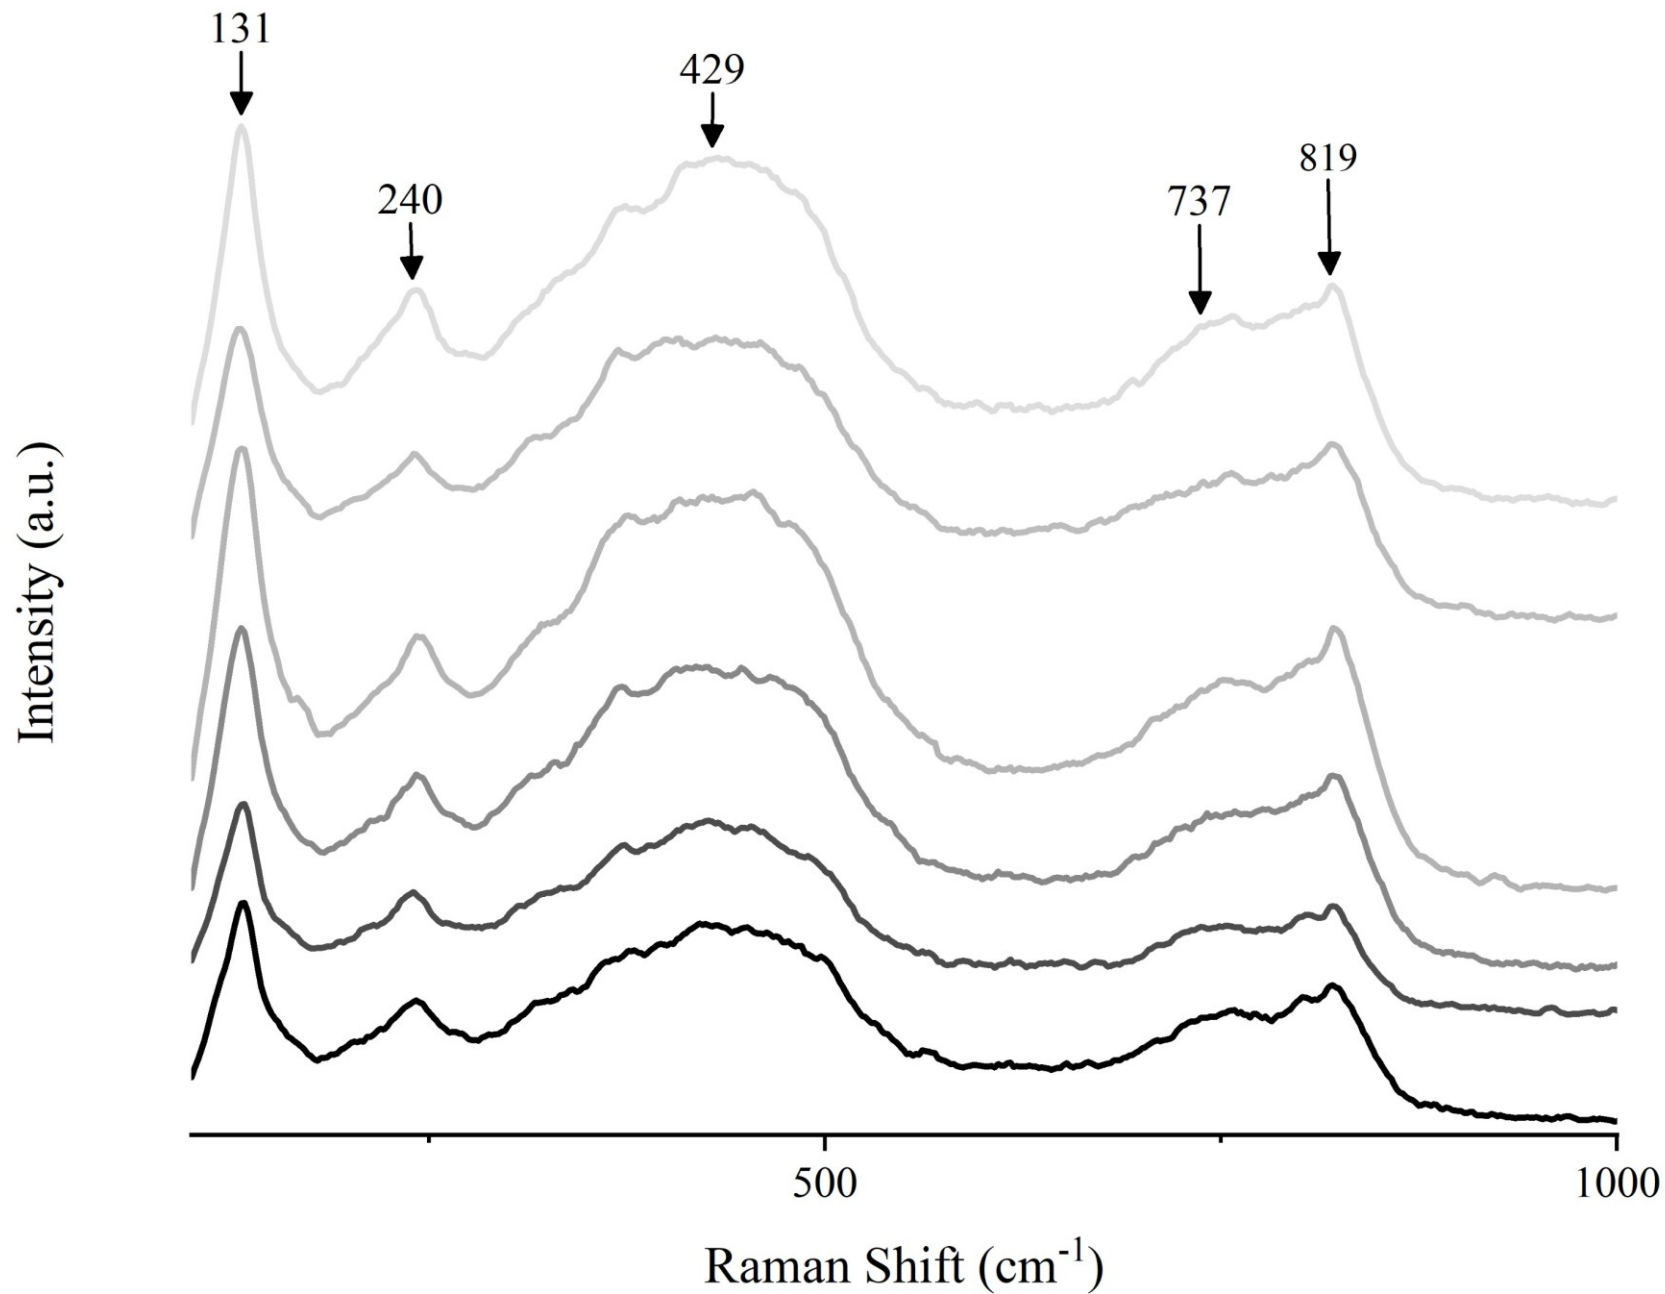

Supplement: d2an01774a10.pdf [file d2an01774a10.pdf]

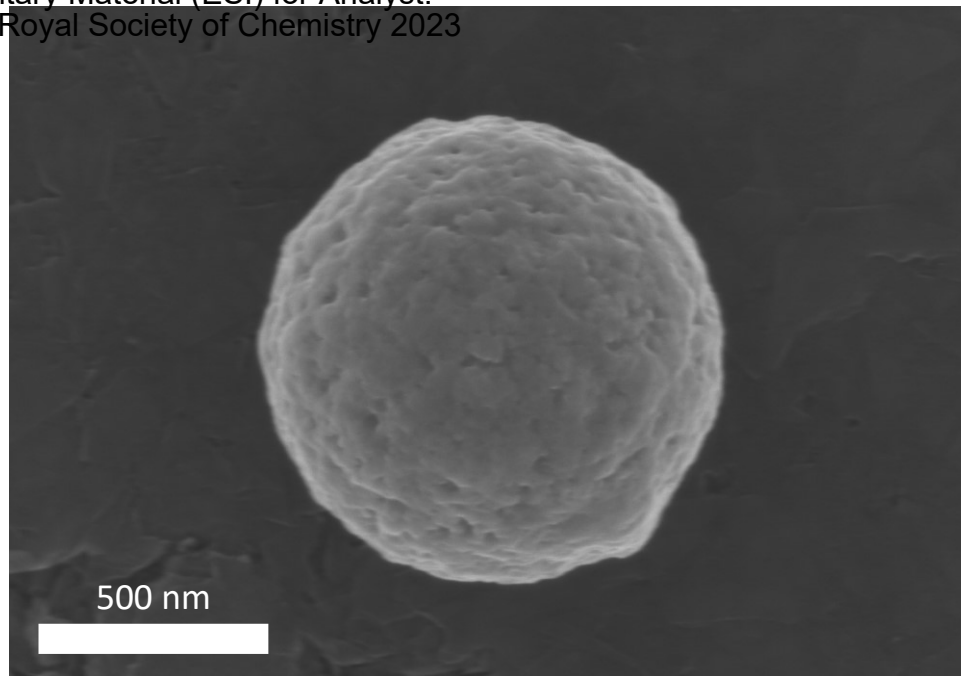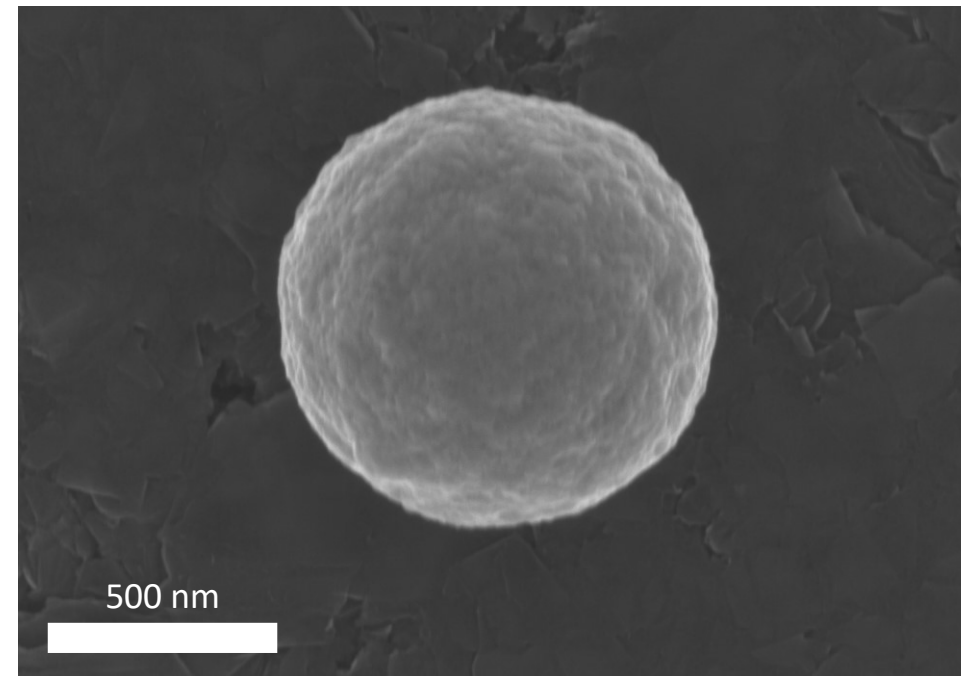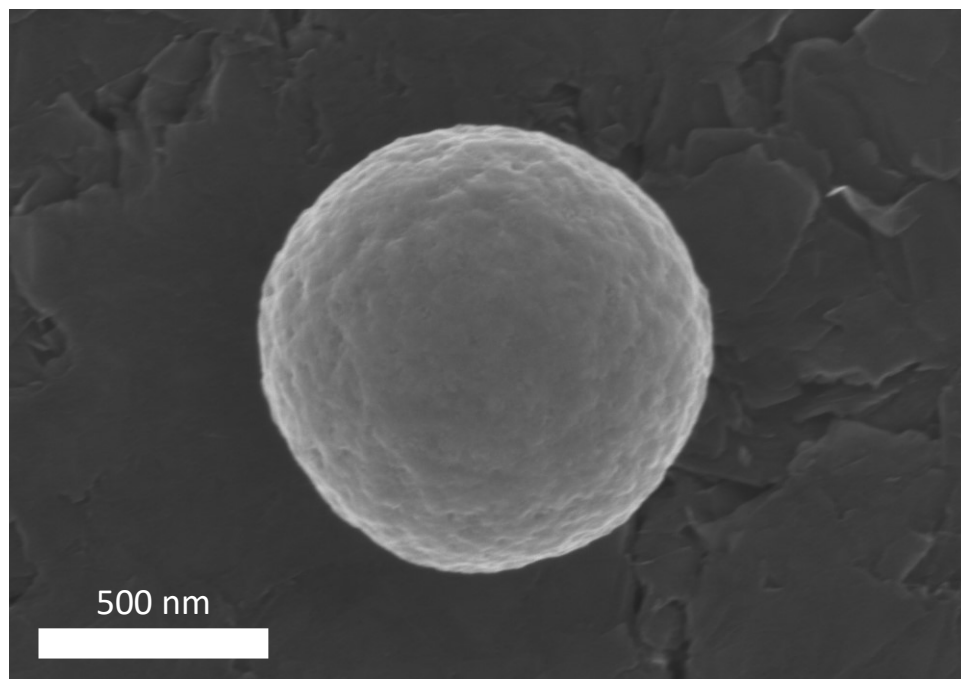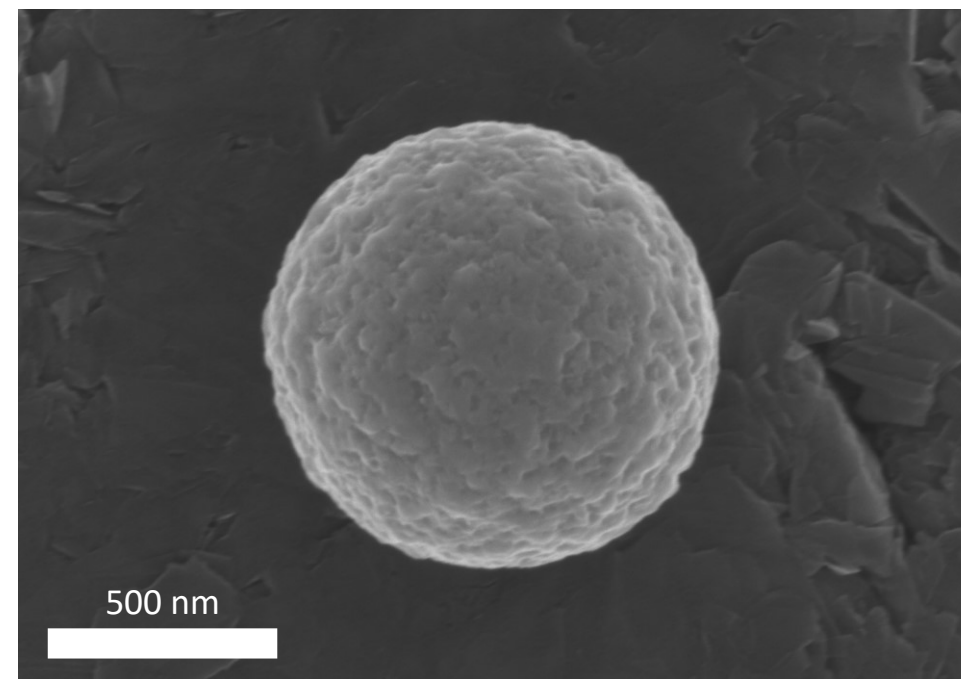

Supplement: d2an01774a2.pdf [file d2an01774a2.pdf]

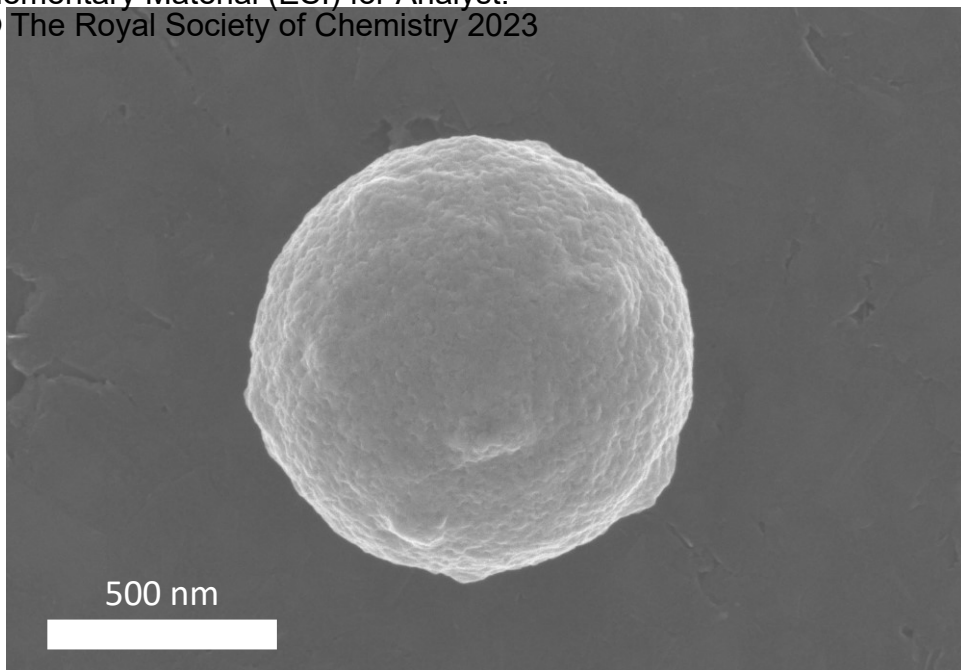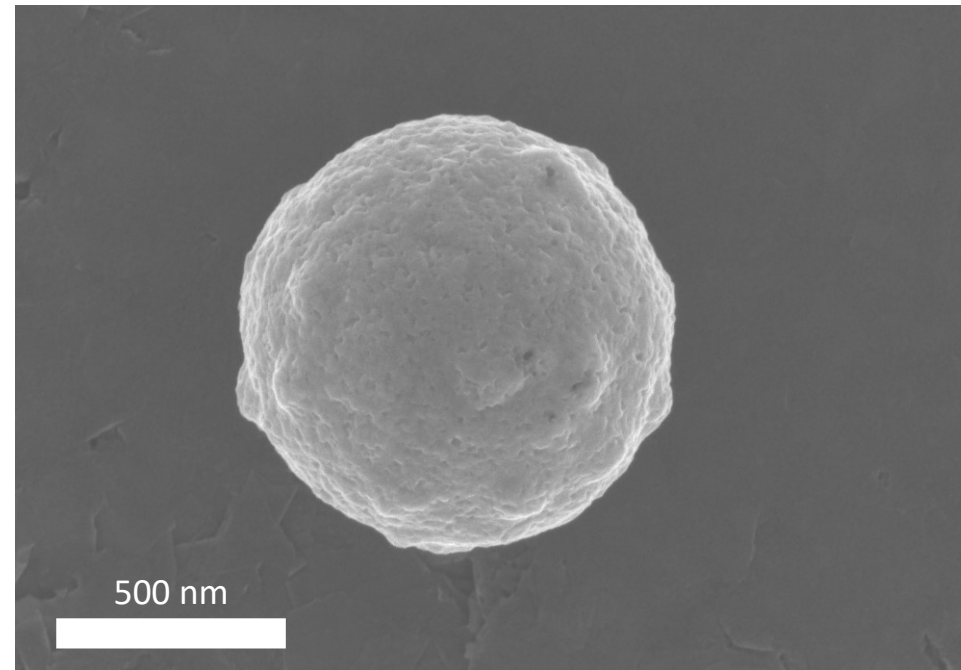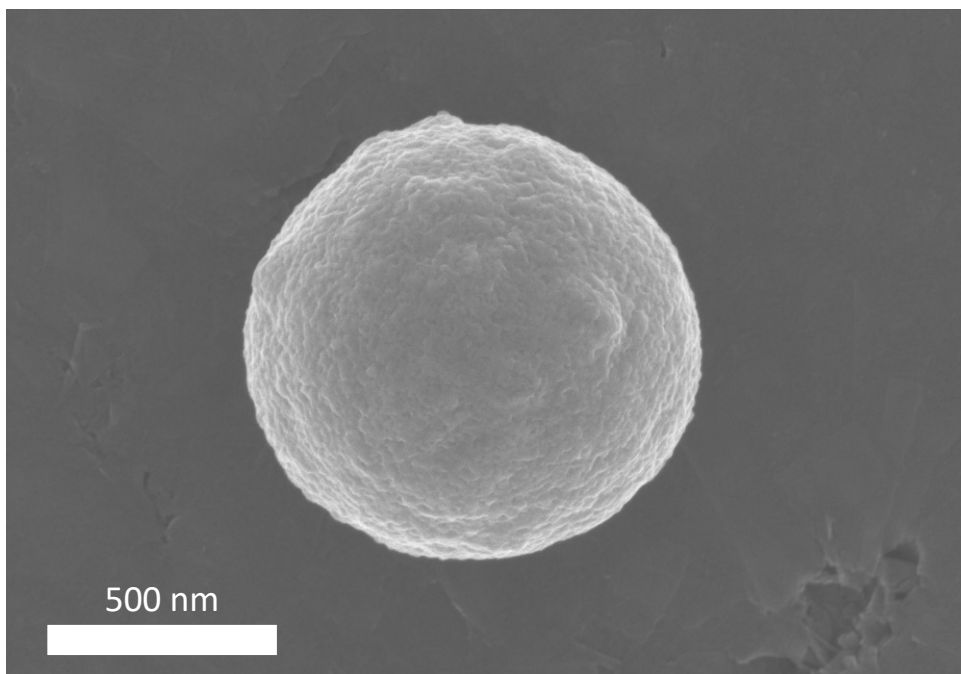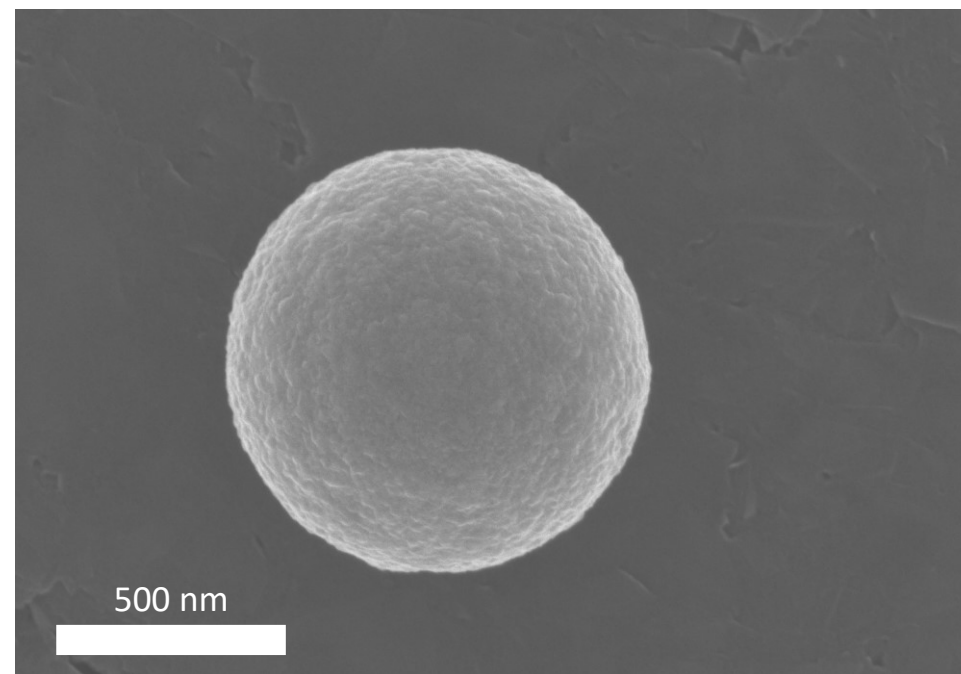

Supplement: d2an01774a4.pdf [file d2an01774a4.pdf]

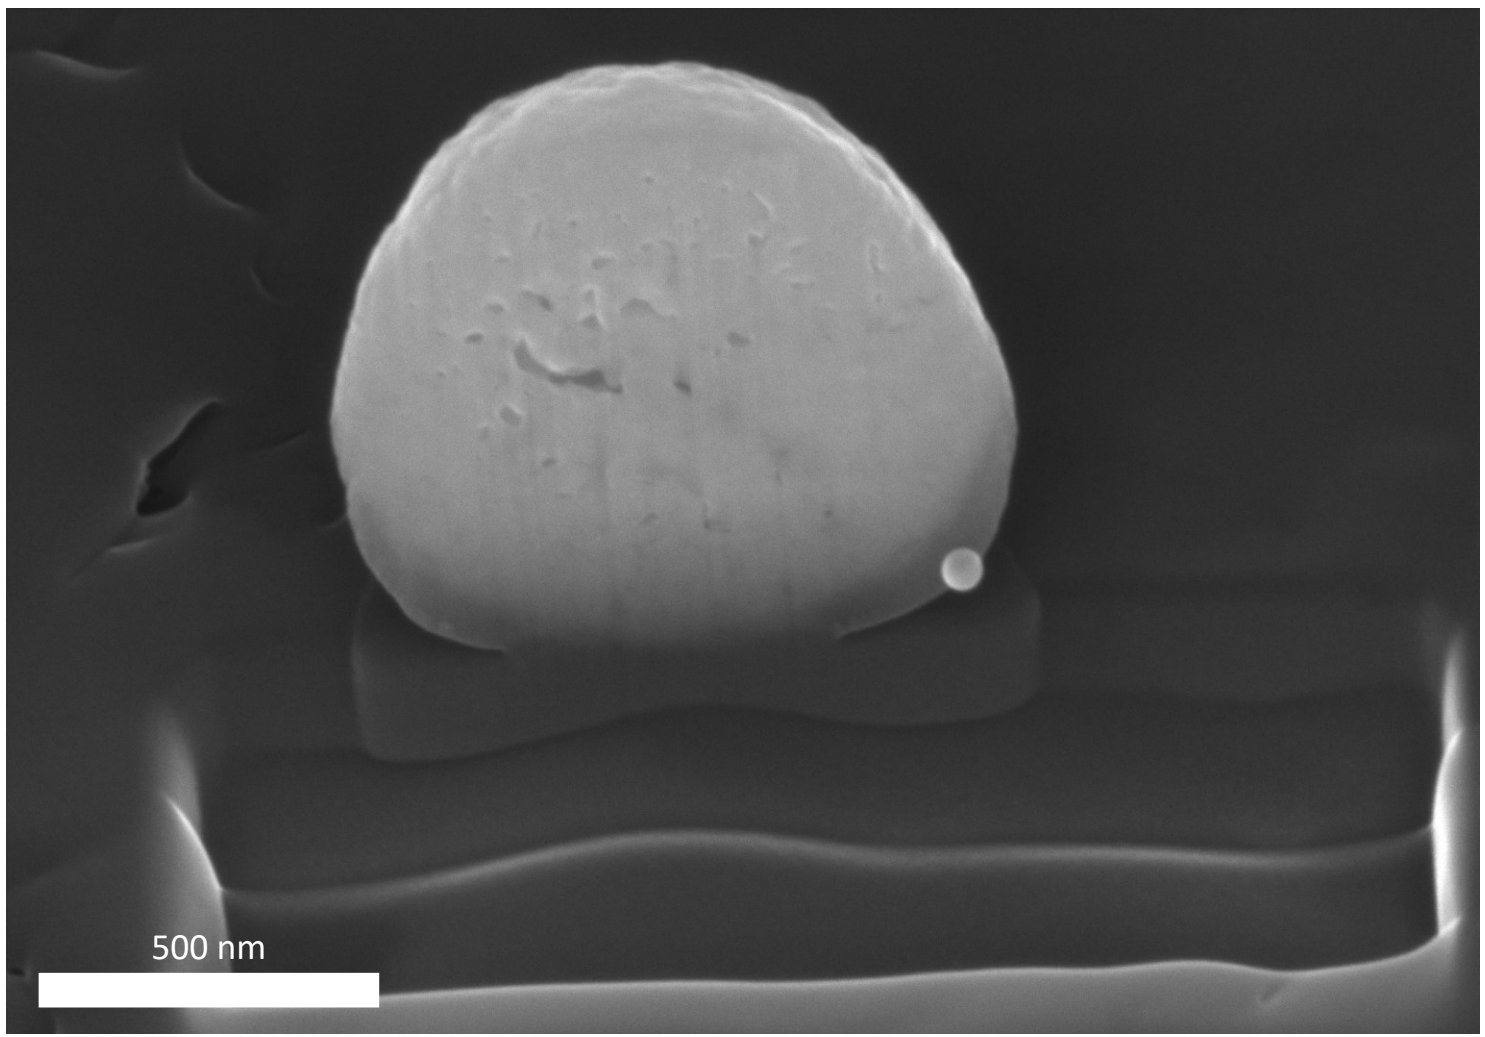

Supplement: d2an01774a5.pdf [file d2an01774a5.pdf]

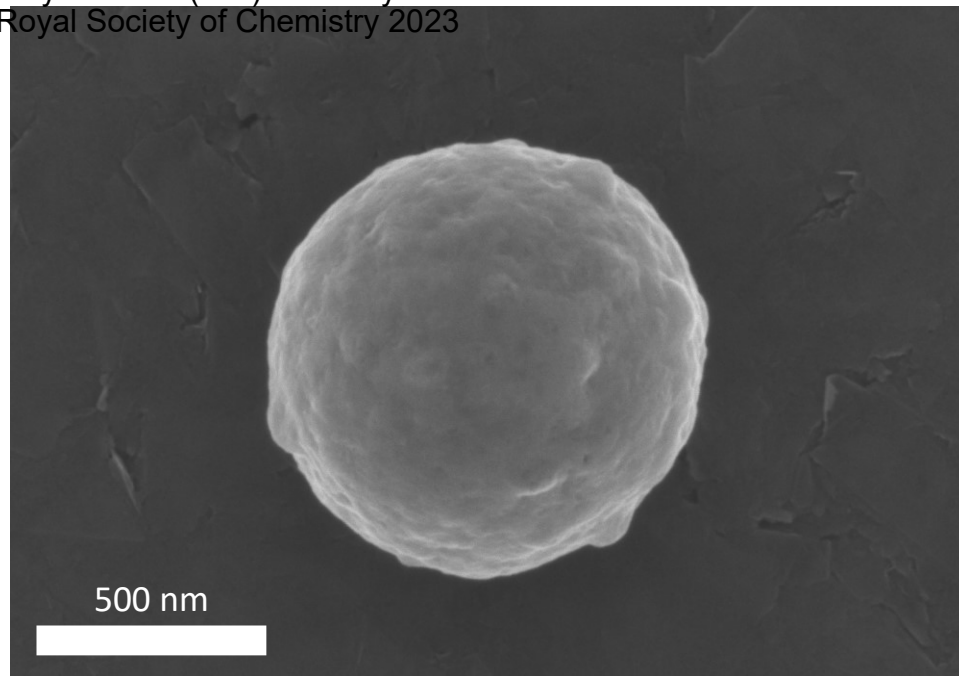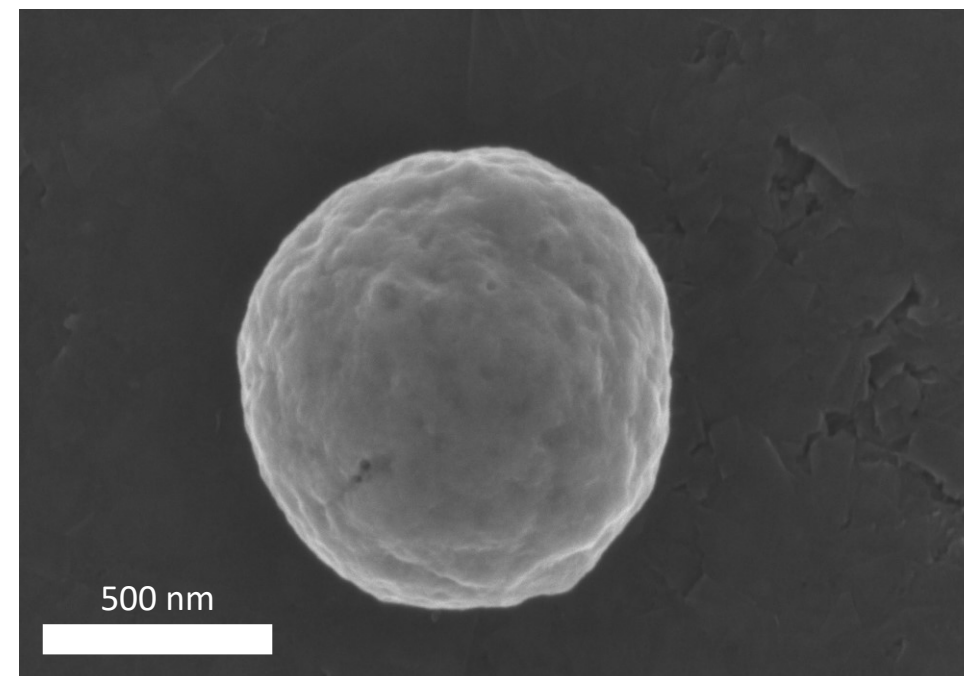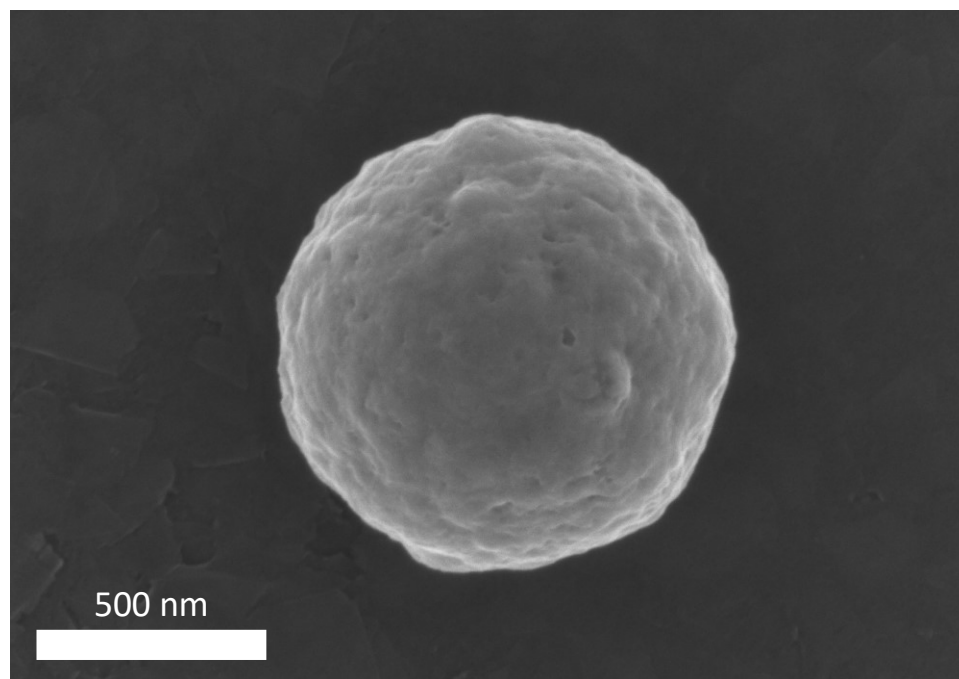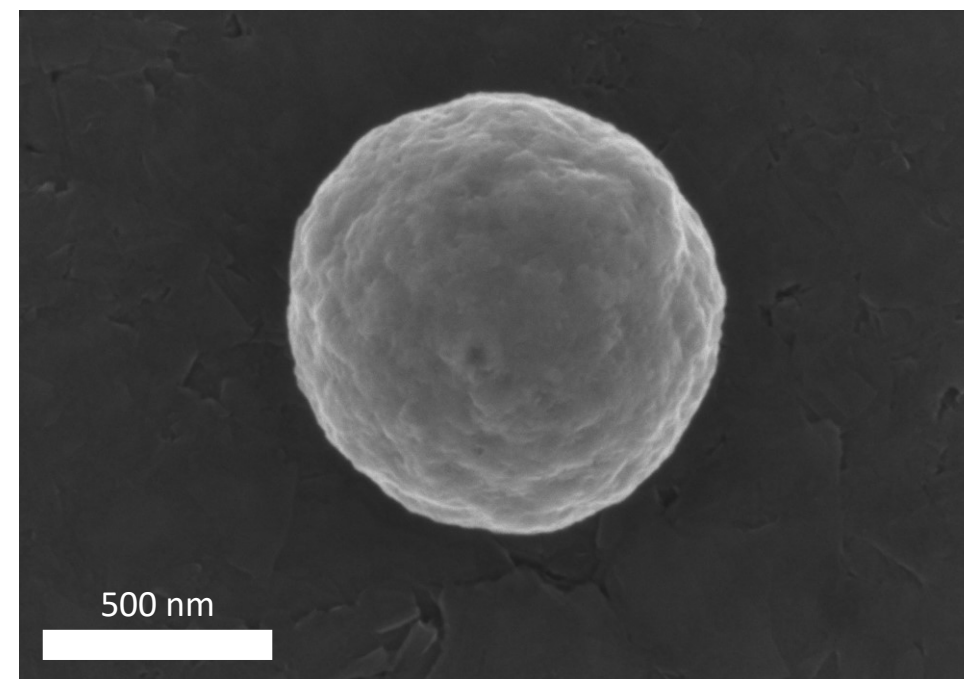

Supplement: d2an01774a6.pdf [file d2an01774a6.pdf]

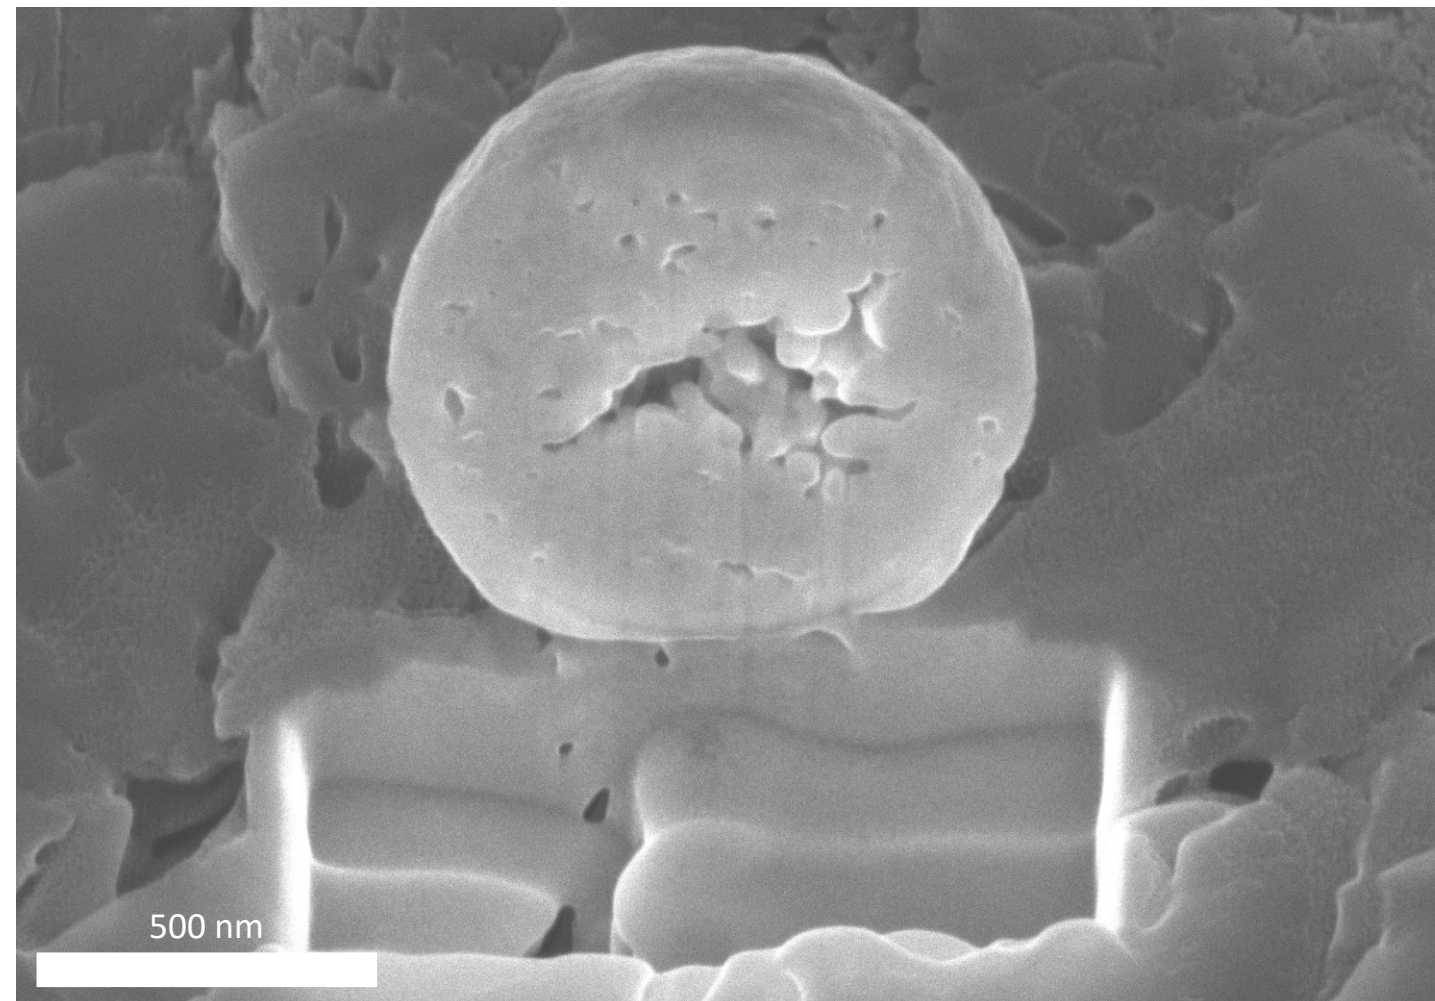

Supplement: d2an01774a7.pdf [file d2an01774a7.pdf]

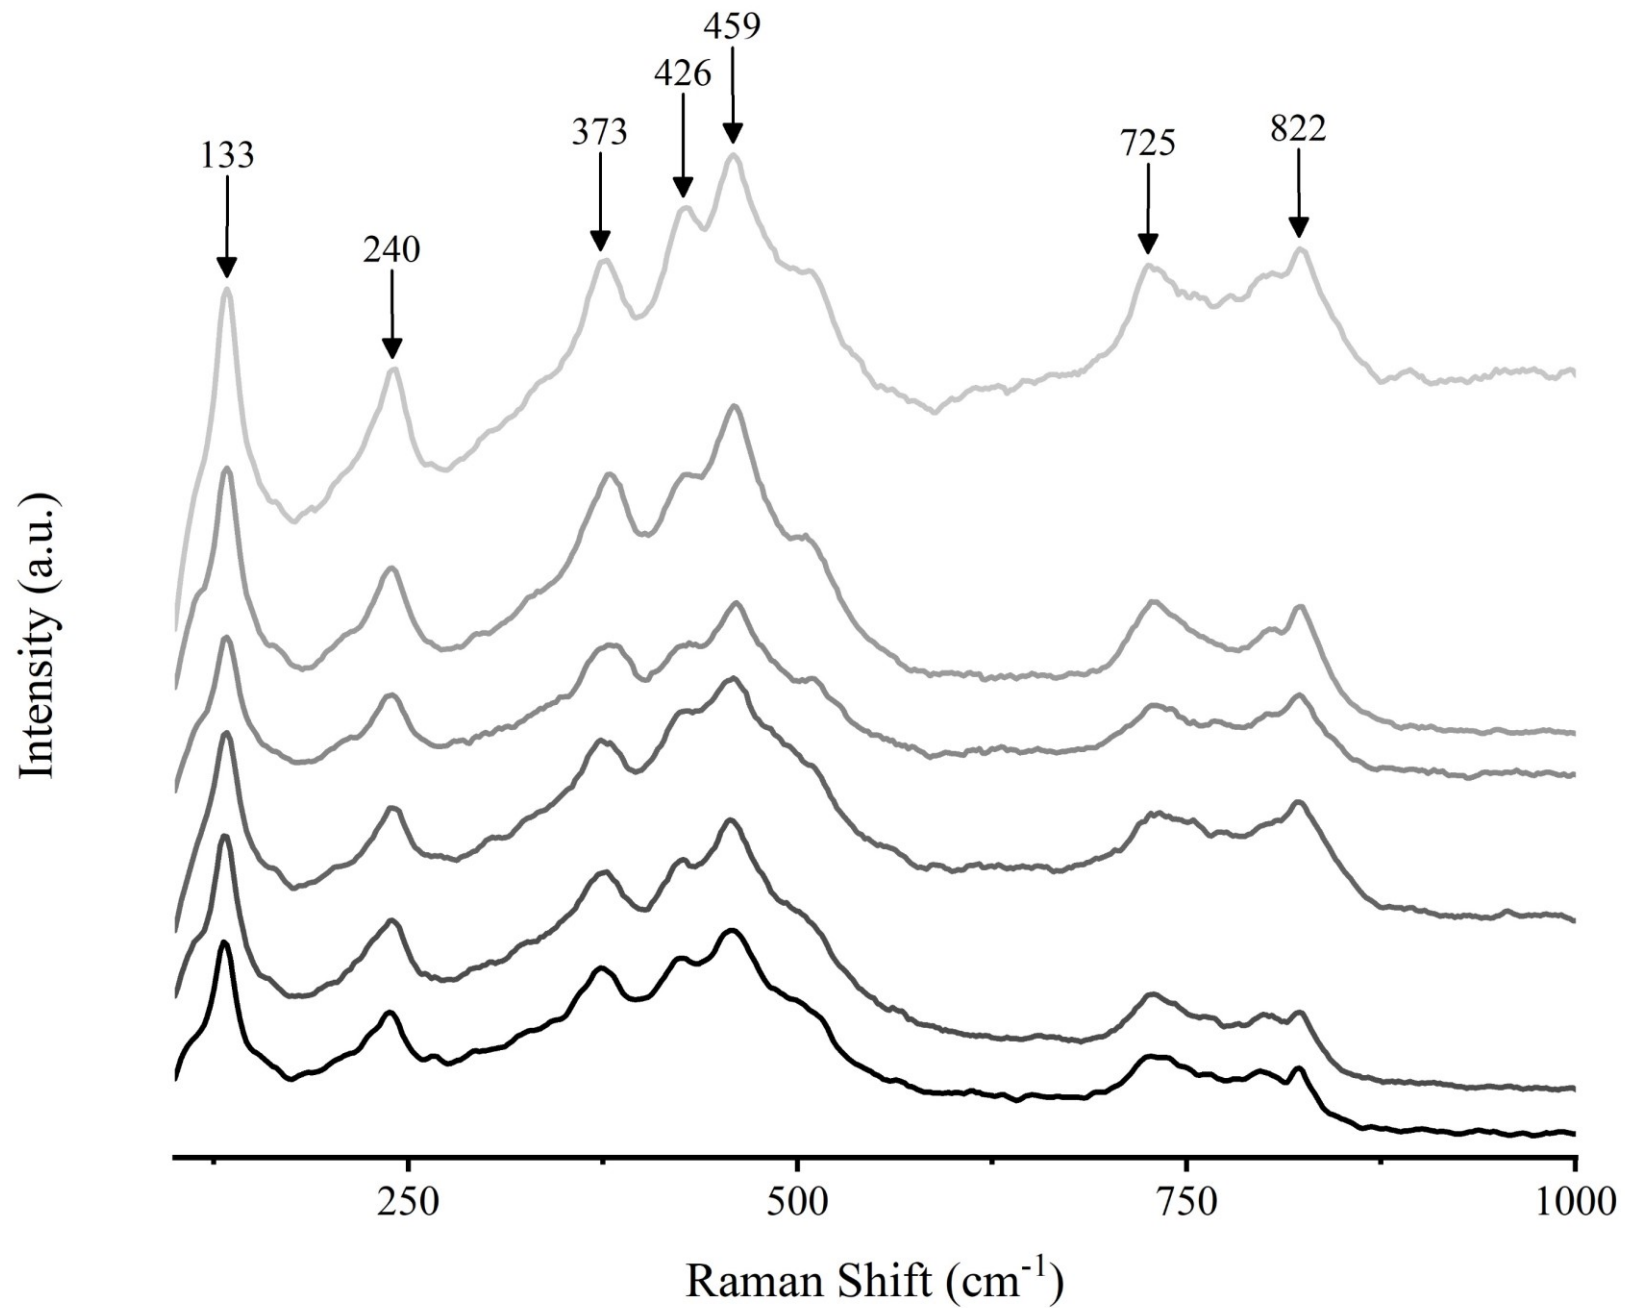

Supplement: d2an01774a8.pdf [file d2an01774a8.pdf]

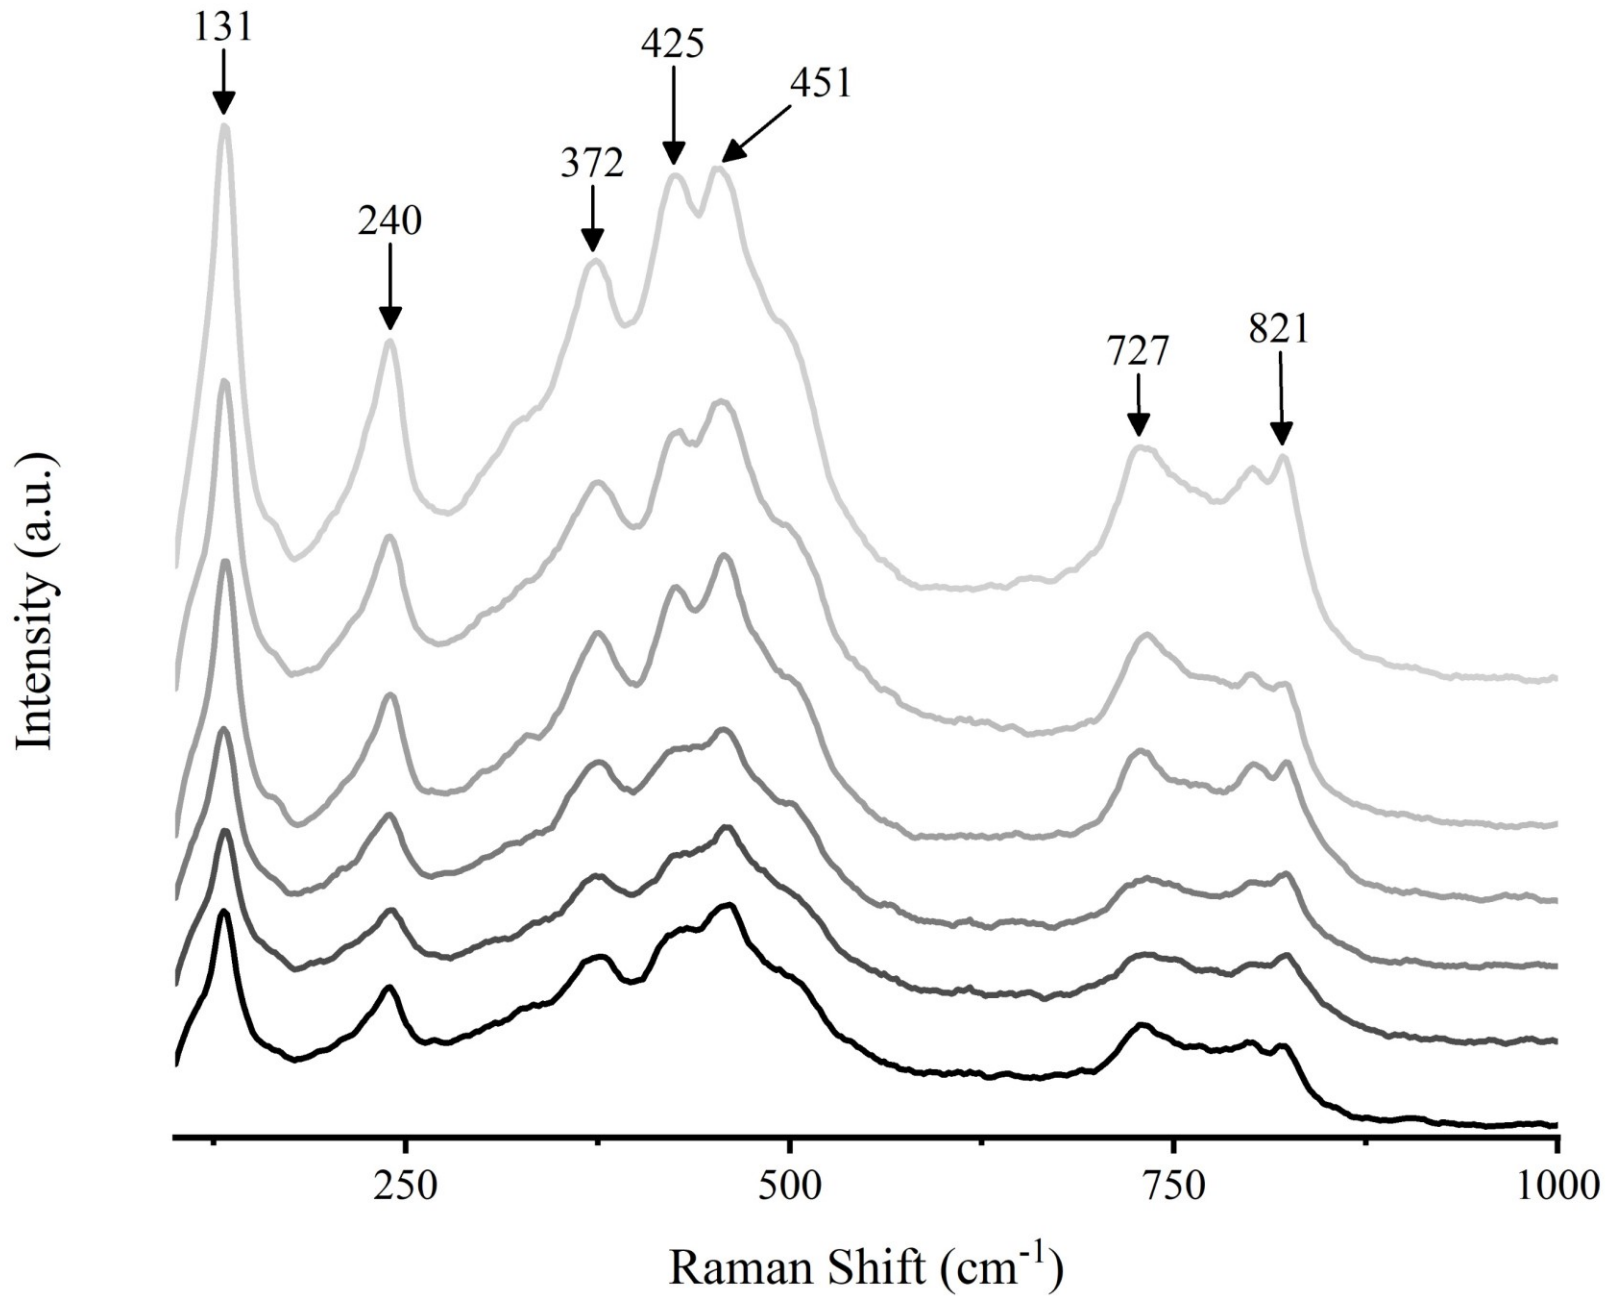

Supplement: d2an01774a9.pdf [file d2an01774a9.pdf]
